# Supplementary material
Source: ML conference proceedings conference paper supplement (https://openreview.net/forum?id=ZXoSAAlBnW8)

Cloud

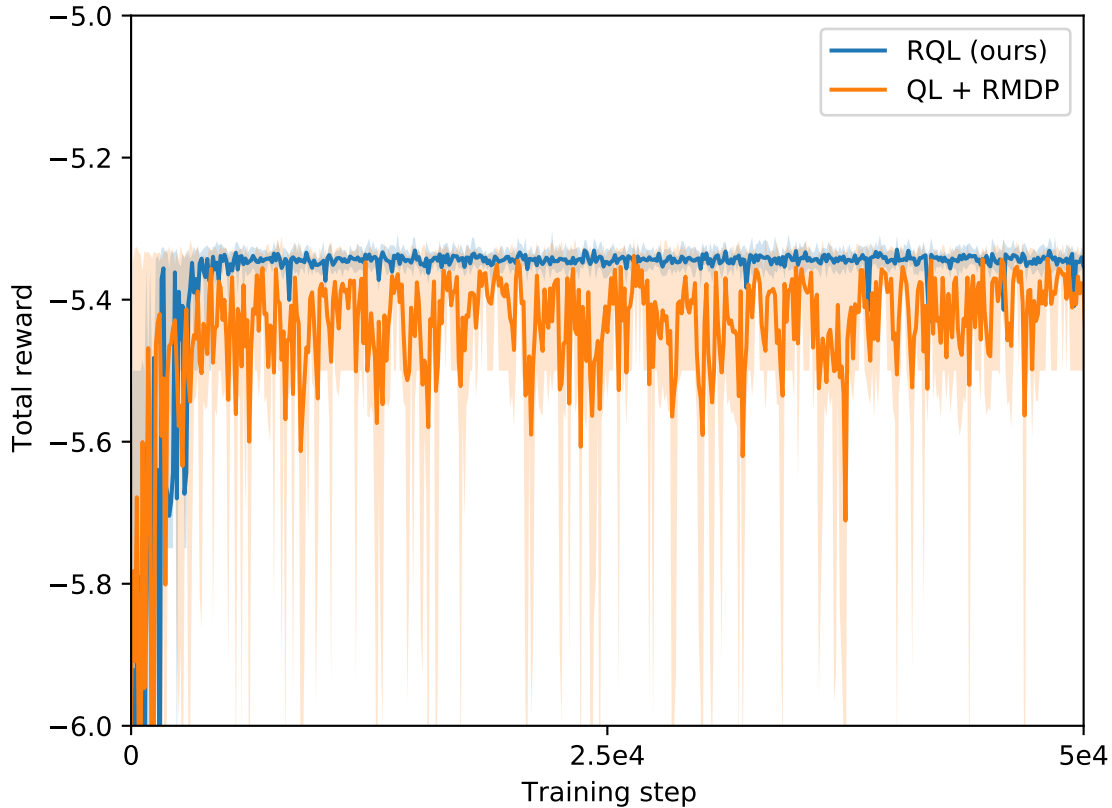

Supplement: supplementary_material [file attachment]

# Spelunking

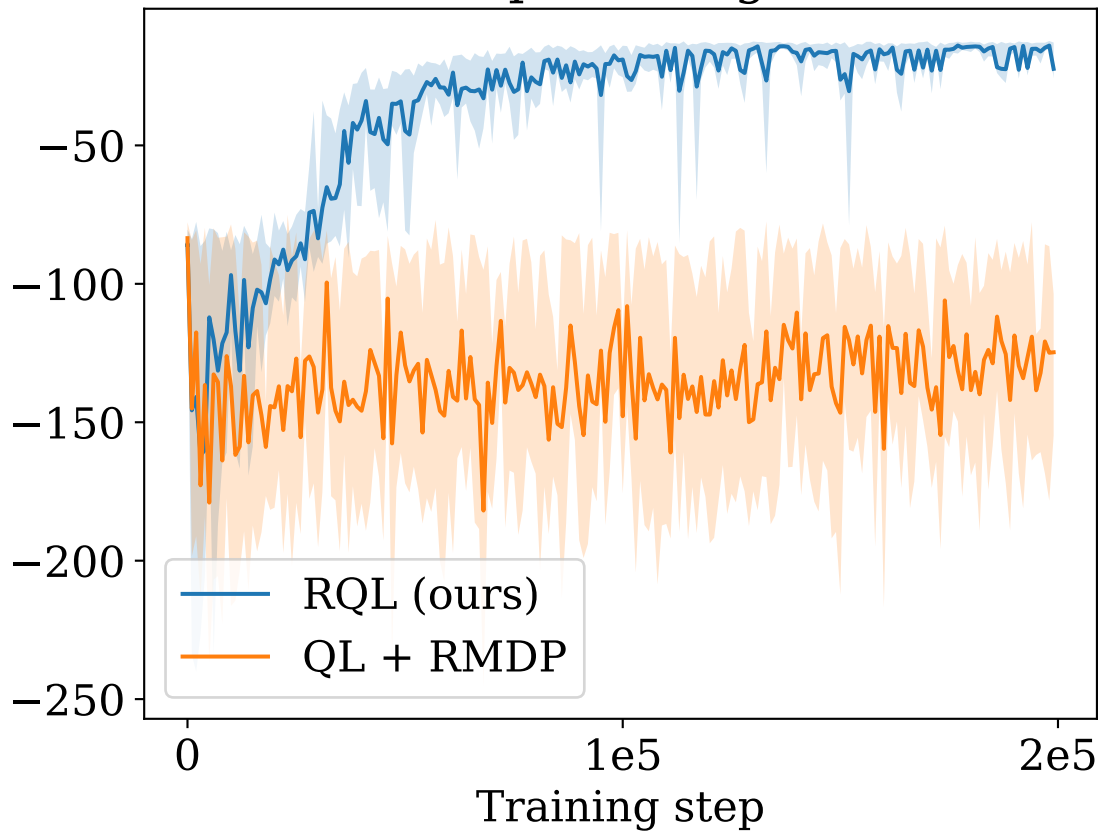

Supplement: supplementary_material [file attachment]

# Palindrome

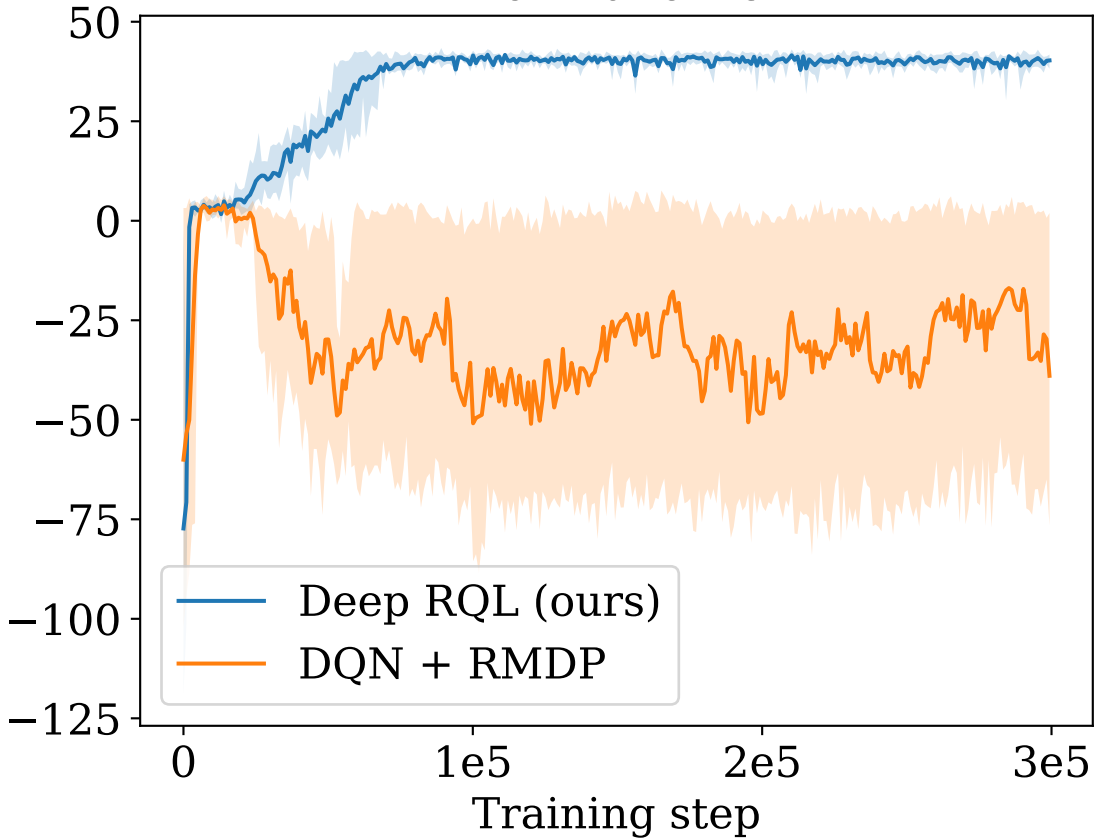

Supplement: supplementary_material [file attachment]
